# Supplementary material
Source: HighWire-hosted journal article supplement (https://oem.bmj.com/content/81/3/113)
Supplement: inline-supplementary-material-1 [file inline-supplementary-material-1.pdf]

## **Ethnic inequalities experienced by NHS staff in England during the COVID-19 pandemic: Supplementary Material**

|                                                                                         |   |
|-----------------------------------------------------------------------------------------|---|
| Supplementary Material A: List of participating NHS Trusts .....                        | 2 |
| Supplementary Material B: Census grouping of ethnicities .....                          | 3 |
| Supplementary Material C: Sample composition comparison.....                            | 4 |
| Supplementary Material D: Understanding Employee Rights.....                            | 5 |
| Supplementary Material E: Subgroup analyses .....                                       | 6 |
| Supplementary Tables: Table 3 and Table 4 (with both crude and adjusted estimates)..... | 7 |
| Supplementary Figure: Survey Timeline .....                                             | 9 |

## Supplementary Material A: List of participating NHS Trusts

The following NHS Trust participated in the NHCHECK study.

---

**Trust names**

---

Avon & Wiltshire Mental Health Partnership NHS Trust

Cambridge University Hospitals NHS Foundation Trust

Cambridgeshire and Peterborough NHS Trust

Cornwall Partnership Trust

Devon Partnership NHS Trust

East Suffolk and North Essex NHS Trust

Gloucestershire Hospitals NHS Trust

Guy's and St Thomas' NHS Trust

King's College Hospital and PRUH

Lancashire and South Cumbria NHS Trust

Norfolk and Norwich University Hospitals

Nottinghamshire Healthcare NHS Trust

Royal Papworth Hospital

Sheffield Health and Social Care NHS Foundation Trust

South London and Maudsley (SLAM)

Tees Esk and Wear Valleys NHS Foundation Trust

University Hospitals of Derby and Burton

University Hospitals of Leicester NHS Trust

---

## Supplementary Material B: Census grouping of ethnicities

---

### Asian or Asian British

- Indian
- Pakistani
- Bangladeshi
- Chinese
- Any other Asian background

### Black, Black British, Caribbean, or African

- Caribbean
- African
- Any other Black, Black British, or Caribbean background

### Mixed or multiple ethnic groups

- White and Black Caribbean
- White and Black African
- White and Asian
- Any other Mixed or multiple ethnic background

### White

- English, Welsh, Scottish, Northern Irish or British
- Irish
- Gypsy or Irish Traveller
- Roma
- Any other White background

### Other ethnic group

- Arab
  - Any other ethnic group
-

### Supplementary Material C: Sample composition comparison

|                          | Baseline<br>(N = 22,834) | Inequalities Survey<br>(N = 4,622) |
|--------------------------|--------------------------|------------------------------------|
| <b>Ethnicity</b>         |                          |                                    |
| White British            | 18,127 (79%)             | 3,741 (81%)                        |
| White Other              | 1,446 (6%)               | 392 (9%)                           |
| Black                    | 991 (4%)                 | 136 (3%)                           |
| Asian                    | 1,503 (7%)               | 220 (5%)                           |
| Mixed/Other              | 767 (3%)                 | 133 (3%)                           |
| <b>Gender</b>            |                          |                                    |
| female                   | 18,487 (81%)             | 3,725 (81%)                        |
| male                     | 4,232 (19%)              | 825 (18%)                          |
| other                    | 109 (1%)                 | 72 (2%)                            |
| <b>Age group (years)</b> |                          |                                    |
| ≤30                      | 4,367 (20%)              | 645 (14%)                          |
| 31-40                    | 5,068 (23%)              | 923 (20%)                          |
| 41-50                    | 5,794 (26%)              | 1,290 (28%)                        |
| 51+                      | 6,850 (31%)              | 1,764 (38%)                        |
| Unweighted %             |                          |                                    |

## Supplementary Material D: Understanding Employee Rights

### Regression to show associations between ethnicity and understanding employee rights

|                                                                                                       | n(%)          | Crude OR<br>[95%CI] | Adjusted OR<br>[95%CI] |
|-------------------------------------------------------------------------------------------------------|---------------|---------------------|------------------------|
| White British                                                                                         | 1,504 (46.3%) | —                   | —                      |
| White Other                                                                                           | 156 (44.8%)   | 0.94 [0.70, 1.26]   | 0.94 [0.69, 1.28]      |
| Black                                                                                                 | 39 (34.8%)    | 0.62 [0.40, 0.96]   | 0.52 [0.32, 0.85]      |
| Asian                                                                                                 | 68 (37.5%)    | 0.70 [0.44, 1.11]   | 0.89 [0.56, 1.40]      |
| Mixed/Other                                                                                           | 50 (27.2%)    | 0.43 [0.20, 0.92]   | 0.49 [0.23, 1.06]      |
| <i>Adjusted models adjust for age, sex, region, contract, job role and month of survey completion</i> |               |                     |                        |

## Supplementary Material E: Subgroup analyses

### Subgroup analysis of probable depression by ethnicity, stratified by BHA and discrimination

|                                     | No BHA<br>n (%) | BHA<br>n (%) | No Discrimination<br>n (%) | Discrimination<br>n (%) |
|-------------------------------------|-----------------|--------------|----------------------------|-------------------------|
| <b>Probable depressive disorder</b> |                 |              |                            |                         |
| White British                       | 350 (15.6)      | 337 (34.4)   | 467 (17.4)                 | 220 (42.9)              |
| White Other                         | 35 (18.0)       | 48 (39.2)    | 50 (19.3)                  | 33 (44.5)               |
| Black                               | 14 (21.7)       | 15 (25.6)    | 13 (18.1)                  | 16 (30.1)               |
| Asian                               | 22 (14.1)       | 25 (37.1)    | 23 (13.8)                  | 24 (45.2)               |
| Mixed/Other                         | 12 (22.8)       | 15 (46.8)    | 12 (19.2)                  | 15 (55.7)               |

BHA = Bullying, Harassment or Abuse

Probable depressive disorder = PHQ-9 score of  $\geq 10$

### Supplementary Tables: Table 3 and Table 4 (with both crude and adjusted estimates)

**Supplementary Table 3: Regression analysis to show associations between ethnicity and redeployment experiences in those who were redeployed (n=1,123) [BOTH CRUDE AND ADJUSTED ESTIMATES]**

| Ethnicity     | Able to challenge redeployment |                      |                        | Warned about redeployment |                      |                        | Able to have a say (input) about redeployment |                      |                        |
|---------------|--------------------------------|----------------------|------------------------|---------------------------|----------------------|------------------------|-----------------------------------------------|----------------------|------------------------|
|               | n (%)                          | Crude OR<br>[95%CI]  | Adjusted OR<br>[95%CI] | n (%)                     | Crude OR<br>[95%CI]  | Adjusted OR<br>[95%CI] | n (%)                                         | Crude OR<br>[95%CI]  | Adjusted OR<br>[95%CI] |
| White British | 508 (50.6)                     | —                    | —                      | 650 (70.3)                | —                    | —                      | 489 (51.1)                                    | —                    | —                      |
| White Other   | 66 (56.9)                      | 1.29<br>[0.81, 2.06] | 1.07<br>[0.65, 1.76]   | 76 (67.3)                 | 0.87<br>[0.53, 1.43] | 0.74<br>[0.42, 1.30]   | 59 (49.4)                                     | 0.93<br>[0.59, 1.49] | 0.70<br>[0.44, 1.12]   |
| Black         | 15 (42.5)                      | 0.72<br>[0.34, 1.52] | 0.58<br>[0.28, 1.20]   | 20 (62.1)                 | 0.69<br>[0.32, 1.49] | 0.68<br>[0.31, 1.53]   | 12 (31.5)                                     | 0.44<br>[0.20, 0.95] | 0.33<br>[0.15, 0.72]   |
| Asian         | 35 (72.4)                      | 2.56<br>[1.29, 5.08] | 3.17<br>[1.26, 7.99]   | 41 (75.3)                 | 1.29<br>[0.60, 2.74] | 1.46<br>[0.59, 3.62]   | 35 (68.5)                                     | 2.08<br>[1.03, 4.20] | 2.38<br>[0.95, 5.97]   |
| Mixed/Other   | 15 (23.2)                      | 0.30<br>[0.09, 0.95] | 0.37<br>[0.14, 0.94]   | 21 (32.2)                 | 0.20<br>[0.06, 0.68] | 0.23<br>[0.09, 0.58]   | 18 (30.6)                                     | 0.42<br>[0.13, 1.41] | 0.52<br>[0.21, 1.33]   |

*Adjusted models adjust for age, sex, region, contract, job role and month of survey completion*

**Supplementary Table 4: Regression analysis to show associations between workplace experiences and mental and physical health outcomes [BOTH CRUDE AND ADJUSTED ESTIMATES]**

| Workplace Experience                                          | n (%) | Probable Depression<br>(PHQ-9 score ≥10) |                        | n (%)                | Probable Anxiety<br>(GAD-7 score ≥8) |                        | n (%)                | Moderate/Severe Somatic Symptoms<br>(PHQ-15 score ≥10) |                        |                      |
|---------------------------------------------------------------|-------|------------------------------------------|------------------------|----------------------|--------------------------------------|------------------------|----------------------|--------------------------------------------------------|------------------------|----------------------|
|                                                               |       | Crude OR<br>[95%CI]                      | Adjusted OR<br>[95%CI] |                      | Crude OR<br>[95%CI]                  | Adjusted OR<br>[95%CI] |                      | Crude OR<br>[95%CI]                                    | Adjusted OR<br>[95%CI] |                      |
| Unavailable PPE                                               | Yes   | 192 (35.9)                               | 2.15<br>[1.62, 2.87]   | 2.01<br>[1.52, 2.66] | 136 (27.5)                           | 2.01<br>[1.44, 2.80]   | 1.73<br>[1.26, 2.36] | 1,380 (34.0)                                           | 1.90<br>[1.42, 2.54]   | 1.90<br>[1.43, 2.54] |
|                                                               | No    | 568 (20.6)                               | —                      | —                    | 428 (15.9)                           | —                      | —                    | 3,907 (21.0)                                           | —                      | —                    |
| Risk assessment                                               | Yes   | 627 (22.2)                               | 0.81<br>[0.63, 1.04]   | 0.86<br>[0.67, 1.10] | 450 (16.8)                           | 0.80<br>[0.60, 1.06]   | 0.82<br>[0.62, 1.08] | 674 (22.4)                                             | 0.77<br>[0.59, 0.99]   | 0.80<br>[0.62, 1.04] |
|                                                               | No    | 236 (26.0)                               | —                      | —                    | 184 (20.2)                           | —                      | —                    | 242 (27.3)                                             | —                      | —                    |
| Discrimination                                                | Yes   | 304 (43.8)                               | 3.59<br>[2.79, 4.62]   | 3.65<br>[2.83, 4.70] | 226 (34.8)                           | 3.45<br>[2.61, 4.56]   | 3.67<br>[2.79, 4.83] | 309 (41.8)                                             | 3.10<br>[2.42, 3.98]   | 2.99<br>[2.33, 3.85] |
|                                                               | No    | 567 (17.8)                               | —                      | —                    | 416 (13.4)                           | —                      | —                    | 613 (18.8)                                             | —                      | —                    |
| BHA                                                           | Yes   | 436 (35.7)                               | 2.84<br>[2.26, 3.55]   | 3.02<br>[2.42, 3.77] | 341 (28.7)                           | 2.97<br>[2.31, 3.81]   | 3.31<br>[2.58, 4.25] | 461 (36.5)                                             | 2.88<br>[2.31, 3.59]   | 3.00<br>[2.40, 3.75] |
|                                                               | No    | 435 (16.4)                               | —                      | —                    | 301 (11.9)                           | —                      | —                    | 461 (16.6)                                             | —                      | —                    |
| Redeployed                                                    | Yes   | 255 (23.4)                               | 1.02<br>[0.80, 1.30]   | 0.97<br>[0.76, 1.24] | 190 (18.4)                           | 1.09<br>[0.82, 1.43]   | 1.00<br>[0.76, 1.32] | 260 (24.0)                                             | 1.05<br>[0.82, 1.33]   | 0.98<br>[0.76, 1.26] |
|                                                               | No    | 607 (22.9)                               | —                      | —                    | 444 (17.2)                           | —                      | —                    | 655 (23.2)                                             | —                      | —                    |
| Understand redeployment rights                                | Yes   | 320 (18.5)                               | 0.62<br>[0.50, 0.77]   | 0.66<br>[0.53, 0.83] | 232 (14.6)                           | 0.68<br>[0.53, 0.88]   | 0.77<br>[0.60, 1.00] | 350 (18.3)                                             | 0.59<br>[0.47, 0.73]   | 0.62<br>[0.50, 0.77] |
|                                                               | No    | 541 (26.8)                               | —                      | —                    | 402 (20.0)                           | —                      | —                    | 561 (27.6)                                             | —                      | —                    |
| Able to challenge redeployment (if redeployed)                | Yes   | 121 (19.2)                               | 0.62<br>[0.42, 0.92]   | 0.70<br>[0.48, 1.04] | 83 (14.3)                            | 0.57<br>[0.35, 0.91]   | 0.68<br>[0.42, 1.12] | 114 (18.5)                                             | 0.53<br>[0.35, 0.80]   | 0.61<br>[0.41, 0.91] |
|                                                               | No    | 134 (27.8)                               | —                      | —                    | 107 (22.7)                           | —                      | —                    | 146 (29.9)                                             | —                      | —                    |
| Warned about redeployment (if redeployed)                     | Yes   | 156 (18.9)                               | 0.47<br>[0.30, 0.73]   | 0.53<br>[0.35, 0.79] | 119 (15.7)                           | 0.58<br>[0.35, 0.97]   | 0.72<br>[0.44, 1.17] | 158 (20.1)                                             | 0.51<br>[0.33, 0.80]   | 0.58<br>[0.38, 0.88] |
|                                                               | No    | 99 (33.2)                                | —                      | —                    | 71 (24.3)                            | —                      | —                    | 102 (32.9)                                             | —                      | —                    |
| Able to have a say (input) about redeployment (if redeployed) | Yes   | 122 (18.3)                               | 0.56<br>[0.38, 0.83]   | 0.64<br>[0.43, 0.95] | 87 (14.4)                            | 0.58<br>[0.36, 0.93]   | 0.70<br>[0.43, 1.16] | 117 (17.9)                                             | 0.50<br>[0.33, 0.75]   | 0.56<br>[0.38, 0.83] |
|                                                               | No    | 133 (28.6)                               | —                      | —                    | 103 (22.5)                           | —                      | —                    | 143 (30.4)                                             | —                      | —                    |

Adjusted models adjust for age, sex, region, contract, job role and month of survey completion

PPE = Personal Protective Equipment

BHA = Bullying, Harassment or Abuse



## Supplementary Figure: Survey Timeline

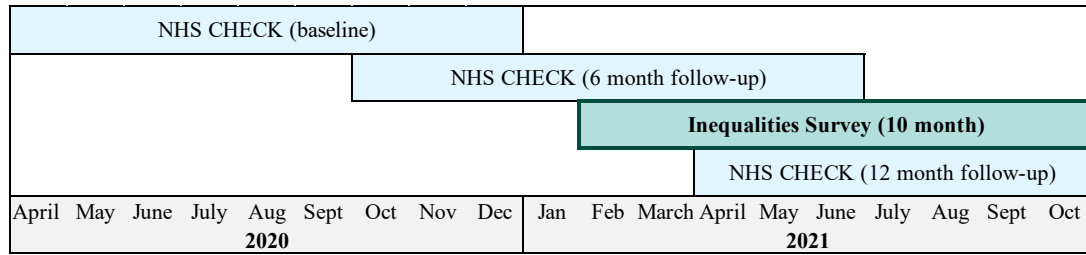

**Supplementary Figure: Timelines for the TIDES Inequalities Survey alongside NHS CHECK surveys**
